# Supplementary material for: Synthesis of a three-phase heterojunction NdVO 4 /V 2 O 5 /BiVO 4 by cation exchange method for the degradation of anionic azo dye orange II
Source: Royal Society of Chemistry journal article supplement (doi:10.1039/d4dt03092c), 2025-01-01
Supplement: d4dt03092c1.pdf [file d4dt03092c1.pdf]

## Supplementary Material

# Synthesis of a three-phase heterojunction $\text{NdVO}_4/\text{V}_2\text{O}_5/\text{BiVO}_4$ by cation-exchange method for the degradation of anionic azo dye orange II

Liyang Li,<sup>a</sup> Zixi Liao<sup>a</sup> Jianhong Yi<sup>\*a</sup> and Dong Fang<sup>\*a</sup>

Faculty of Materials Science and Engineering, Kunming University of Science and Technology, Kunming 650093,

P.R. China.

\* corresponding author.

email: fangdong@kmust.edu.cn

### Note S1. Materials Characterizations

X-ray powder diffraction (XRD) analysis of all photocatalysts was performed using a BDX320 instrument, scanning in the range of  $10^\circ$  to  $80^\circ$  at a rate of  $10^\circ\text{min}^{-1}$ . Rietveld refinement was carried out using GSAS-II software. Surface and internal structural information of the materials were obtained through scanning electron microscopy (SEM) equipped with energy dispersive X-ray spectroscopy (EDS) and transmission electron microscopy (TEM). On an aberration-corrected TEM operated at 300 kV, high-angle annular dark-field scanning transmission electron microscopy (HAADF-STEM) images and elemental electron energy loss spectroscopy (EELS) maps were acquired. X-ray photoelectron spectroscopy (XPS) was conducted to study the chemical states of the samples using a PHI-5000C ESCA system with a Mg/K $\alpha$  source. Additionally, optical properties were measured using ultraviolet-visible diffuse reflectance spectroscopy (DRS) (Shimadzu, UV-3600) and photoluminescence (PL) spectra at 371 nm were obtained using a Shimadzu RF-5301PC spectrophotometer. Time-resolved photoluminescence (TRPL) measurements were carried out at 371 nm using an Edinburgh FLS1000 spectrometer. The surface area of the samples was determined using nitrogen adsorption and the Brunauer-Emmett-Teller (BET) method with the US ASAP (Accelerated Surface Area and Porosimetry) 2020 system. Electron spin resonance (ESR) was measured on a Bruker A300 spectrometer.

**Note S2. DFT Calculations**

Density functional theory calculations were performed using the Vienna Ab initio Simulation Package (VASP) and the Projector Augmented-Wave (PAW) method. The exchange-correlation potential was represented by the Perdew-Burke-Ernzerhof (PBE) functional within the Generalized Gradient Approximation (GGA). A heterostructure consisting of 147 atoms in the Bi(002)/BiVO<sub>4</sub>(001) interface was constructed. A vacuum layer of 15 Å thickness was included along the z-direction. The cutoff energy was set to 500 eV. The k-point sampling grids for the NdVO<sub>4</sub>(112)/V<sub>2</sub>O<sub>5</sub>(200)/BiVO<sub>4</sub>(001) heterostructure were set to 1×2×1. An effective U value of 4.5 eV was selected for the 3d orbitals of vanadium atoms. The structures were relaxed until the convergence criteria for energy and forces were below 1.0×10<sup>-5</sup> eV/atom and 4.0×10<sup>-2</sup> eV/Å, respectively. A vacuum layer of 15 Å was used. The van der Waals interactions were described using the DFT-D3 method.

**Note S3. Photoelectrochemical and electrochemical tests**

Instantaneous photocurrent response (i-t), electrochemical impedance spectroscopy (EIS), and linear sweep voltammetry (LSV) tests were conducted on an electrochemical analyzer equipped with a standard three-electrode system. A 0.5M Na<sub>2</sub>SO<sub>4</sub> aqueous solution was used as the electrolyte in this system. Platinum foil, Ag/AgCl electrode, and ITO glass with a coated area of 2.0×2 cm<sup>2</sup> were chosen as the electrode, reference electrode, and working electrode, respectively. Visible light was simulated using a 300 W xenon lamp.

**Note S4. Photocatalytic measurement**

The photocatalytic activity of the prepared catalyst was assessed by degrading orange II under simulated sunlight (with a 300 W xenon lamp as the light source). A circulating cooling system was used to cool the photoreactor to reduce the impact of the heat generated by the xenon lamp. A sample of 50 mg scraped from the titanium sheet and 100 ml of orange II solution (50 mg L<sup>-1</sup>) were placed into the reactor. The reaction solution was allowed to stand in the dark for 30 minutes before exposure to light to reach solid-liquid equilibrium. Subsequently,

4 ml of the reaction solution was taken every 30 min. The intensity at the maximum absorption wavelength (485 nm) of orange II was measured using a UV-1700PC spectrophotometer to analyze the concentration of the orange II solution. The degradation rate of orange II was calculated using Equation:  $\eta = (C_0 - C_t) / C_0 \times 100\%$

Where:

$\eta$  — Degradation rate;

$C_0$  — Initial concentration of the solution;

$C_t$  — Concentration of the solution at time t under xenon lamp irradiation.

#### **Note S5. Photocatalytic Trapping Agent Experiment**

The participation of reactive radicals in the photocatalytic degradation process was verified by conducting radical trapping experiments. 4-Hydroxy-TEMPO (nitroxyl radical piperidine), isopropanol (IPA) and ethylenediaminetetraacetic acid disodium salt (EDTA-2Na) were used as trapping agents for superoxide radicals ( $\cdot O_2^-$ ), hydroxyl radicals ( $\cdot OH$ ) and holes ( $h^+$ ), respectively. The radical trapping experiments followed the same procedural steps as the photocatalytic degradation experiment. To trap  $\cdot O_2^-$ , 0.05 g of nitroxyl radical piperidine was added to the reaction solution; to trap  $h^+$ , 0.11 g of ethylenediaminetetraacetic acid disodium salt was added to the reaction solution; and to trap  $\cdot OH$ , 2 ml of isopropanol was added to the reaction solution.

#### **Note S5. Chemicals and materials**

All reagents for the preparation of  $NdVO_4$ ,  $NdVO_4/V_2O_5$  and NVB such as ammonium metavanadate ( $NH_4VO_3$ ), sodium hydroxide (NaOH), nitric acid ( $HNO_3$ ), neodymium nitrate hexahydrate ( $Nd(NO_3)_3 \cdot 6H_2O$ ) and bismuth nitrate pentahydrate ( $Bi(NO_3)_3 \cdot 5H_2O$ ) were purchased from Shanghai McLean Biochemical Technology Co. Ltd and used as received without further purification.

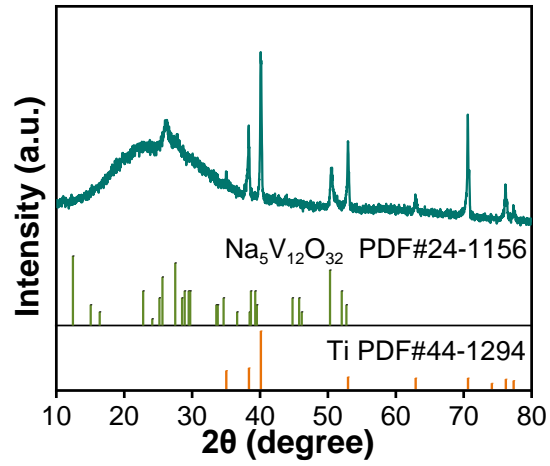

Fig. S1 The XRD spectrum of  $\text{Na}_5\text{V}_{12}\text{O}_{32}$  grown on titanium foil.

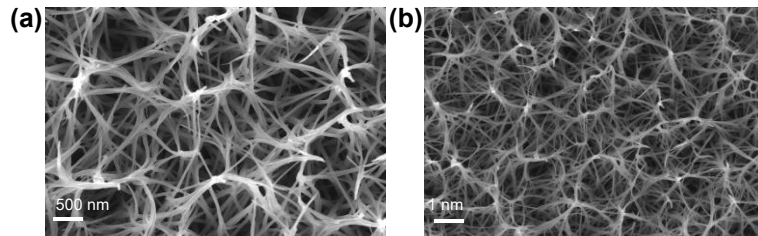

Fig. S2 The SEM spectrum of  $\text{Na}_5\text{V}_{12}\text{O}_{32}$ .

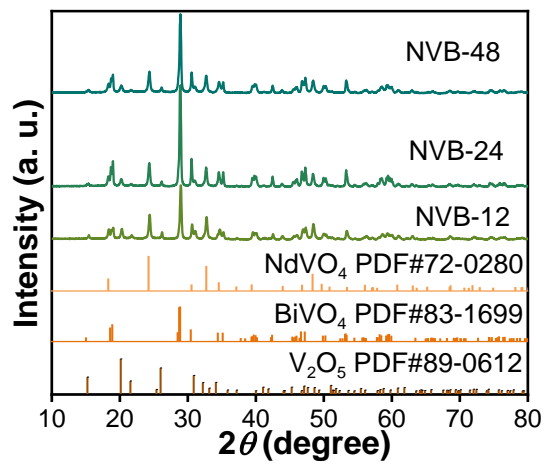

Fig. S3 The XRD spectrum of NVB-12, NVB-24 and NVB-48.

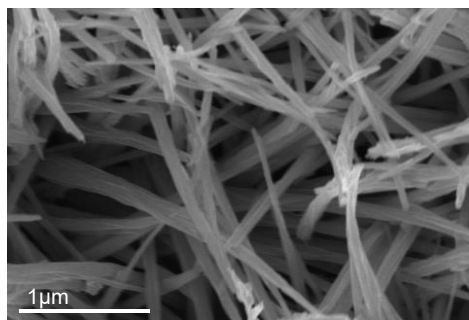

Fig. S4 The SEM spectrum of  $\text{NdVO}_4$ .

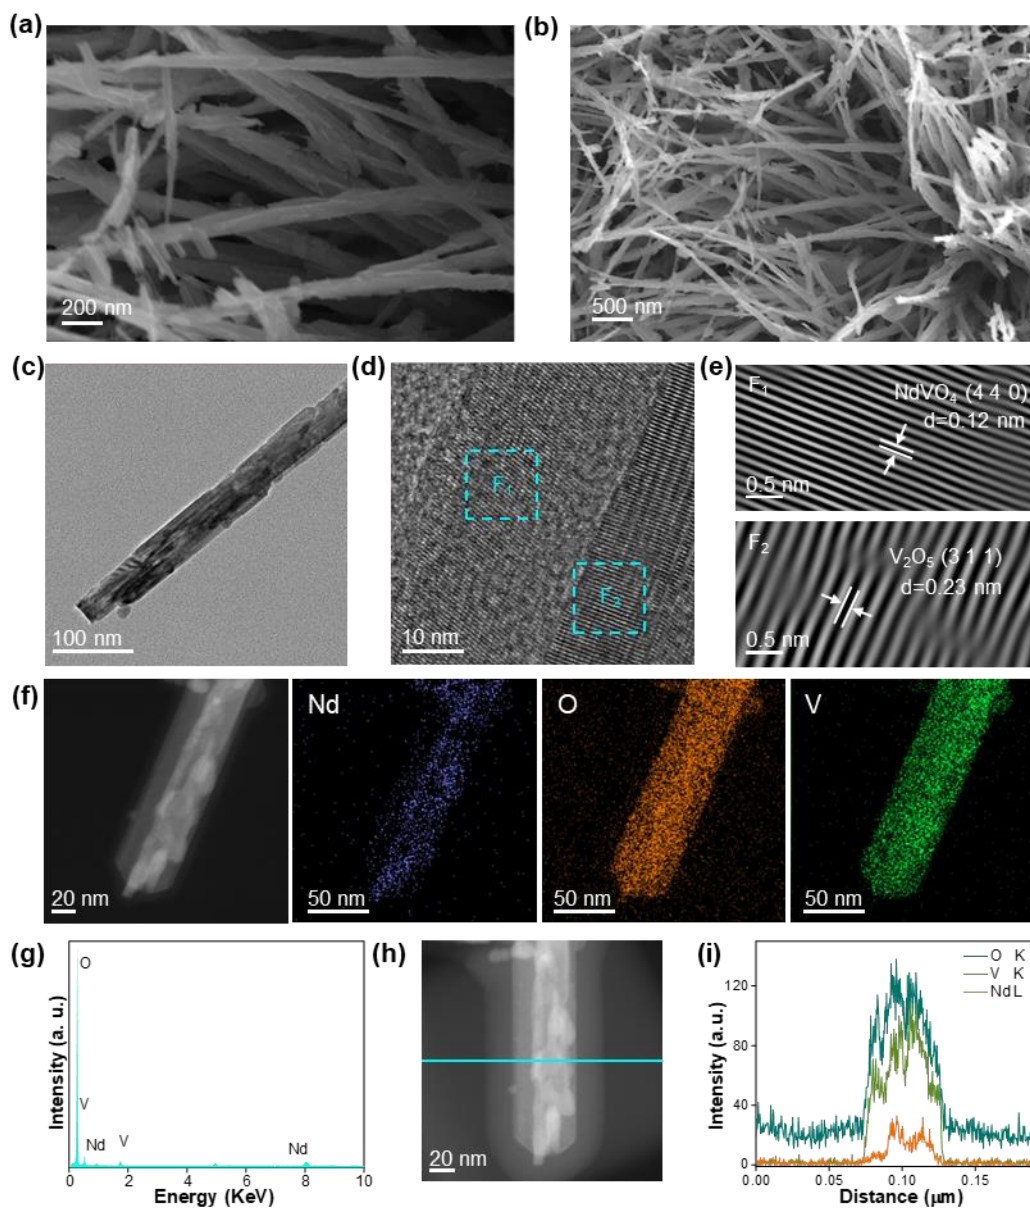

Fig. S5 (a-b) The SEM, (c-e) TEM images and corresponding FFT and IFFT images in the region of  $\text{NdVO}_4/\text{V}_2\text{O}_5$ . (f) EDS mapping images and (g) EELS spectra of  $\text{NdVO}_4/\text{V}_2\text{O}_5$ . (h) The TEM image of the  $\text{NdVO}_4/\text{V}_2\text{O}_5$  and (i) the corresponding EDS line scan.

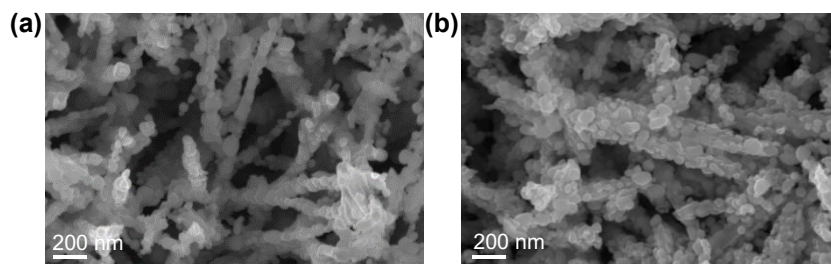

Fig. S6 The SEM images of (a) NVB-12 and (b) NVB-48.

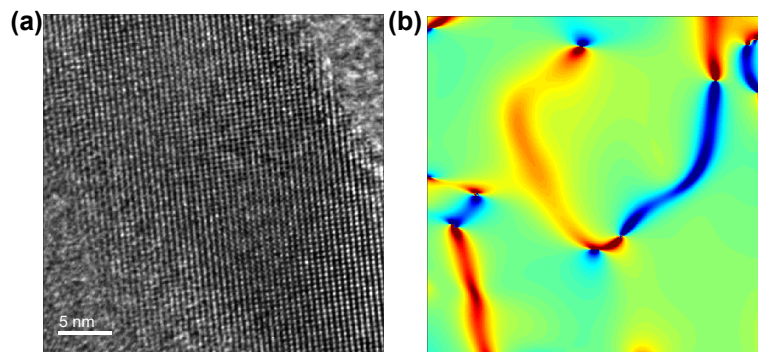

Fig. S7 The GPA strain map of  $\text{NdVO}_4/\text{V}_2\text{O}_5$ , showing  $\epsilon_{xy}$  component.

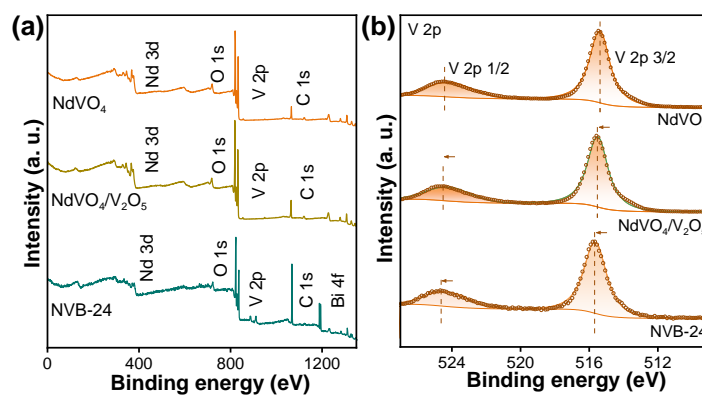

Fig. S8 The full XPS spectra of  $\text{NdVO}_4$ ,  $\text{NdVO}_4/\text{V}_2\text{O}_5$  and NVB-24. (b) The XPS spectra of V2p for the  $\text{NdVO}_4$ ,

$\text{NdVO}_4/\text{V}_2\text{O}_5$  and NVB-24.

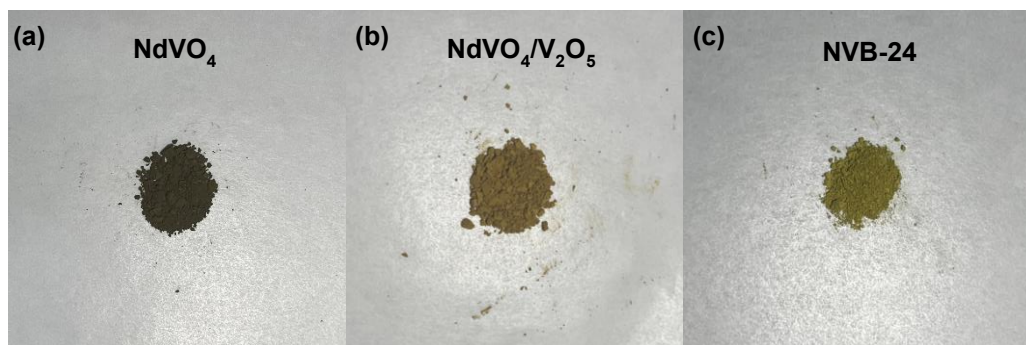

Fig. S9 Digital photos of three products.

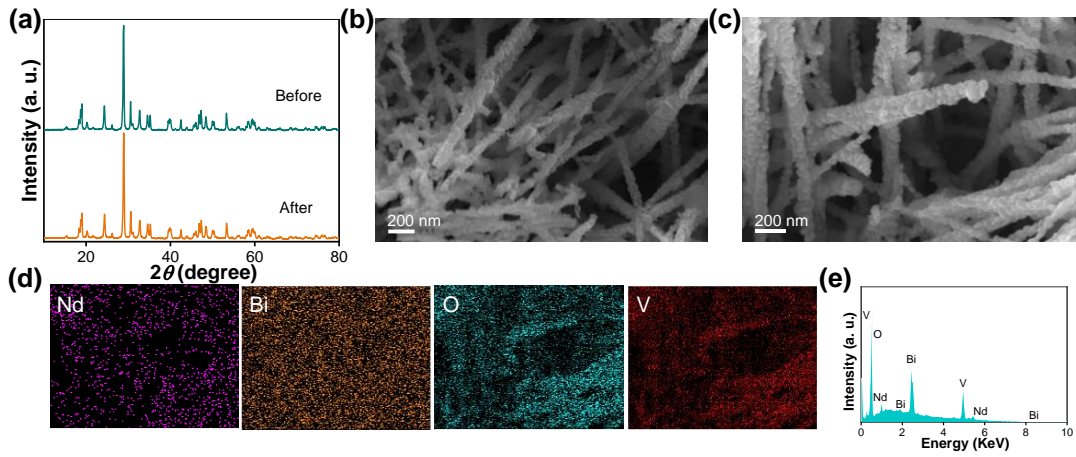

Fig. S10 (a) The XRD images before and after cyclic test of NVB-24.

(b, c) The SEM images and (d, e) EDS mapping images after cyclic test of NVB-24.

Tab. S1 The cell parameters of NVB-24 after XRD refinement.

|                    | NVB-24            |                               |                   |
|--------------------|-------------------|-------------------------------|-------------------|
|                    | NdVO <sub>4</sub> | V <sub>2</sub> O <sub>5</sub> | BiVO <sub>4</sub> |
| a (Å)              | 7.3113            | 11.4993                       | 5.1892            |
| b (Å)              | 7.3113            | 3.5665                        | 5.0960            |
| c (Å)              | 6.4530            | 4.3889                        | 11.6953           |
| α (°)              | 90                | 90                            | 90                |
| β (°)              | 90                | 90                            | 90                |
| γ (°)              | 90                | 90                            | 90.3327           |
| V(A <sup>3</sup> ) | 344.9430          | 180                           | 309.2700          |

Tab. S2 The ratios of O<sub>v</sub> for the NdVO<sub>4</sub> and NVB-24.

| samples           | O <sub>v</sub> (%) |
|-------------------|--------------------|
| NdVO <sub>4</sub> | 17                 |
| NVB-24            | 26                 |

Tab. S3 The degradation rate of orange II by NVB-24 is compared with that of photocatalysts reported in previous literature.

| Photocatalysts                                  | Light source             | Degradation rate (%) | Refs.     |
|-------------------------------------------------|--------------------------|----------------------|-----------|
| NVB-24                                          | 50 mg/L                  | 96.15                | This work |
| ZOFA-20                                         | 100 mg/L                 | 77.27                | 1         |
| BiOI/HKUST-1                                    | 200 mg/L                 | 94.70                | 2         |
| Zn <sub>0.9</sub> Co <sub>0.1</sub> O           | 10 mg/L                  | 80.00                | 3         |
| Montmorillonite KSF                             | 12 mg/L                  | 76.40                | 4         |
| Trace Cu(II)                                    | 20 mg/L                  | 95.52                | 5         |
| Fe <sup>3+</sup> /H <sub>2</sub> O <sub>2</sub> | 1.0 × 10 <sup>-4</sup> M | 81.40                | 6         |
| FeOCl/WS <sub>2</sub>                           | 60 mg/L                  | 93.40                | 7         |

#### References

- 1 V. H. Hoang, T. H. H. Chu, T. D. Nguyen, T. H. V. Nguyen, T. H. Nguyen, T. C. Luu, H. T. Van, H. Nguyen, D. T. Duong and V. H. L. Nguyen, *Korean J. Chem. Eng.*, 2024, **41**, 1415–1425.
- 2 S. Zhang, R. Wang, X. Cheng, J. Lian, X. Liu and J. Tang, *Water*, 2024, **16**, 1805.
- 3 G. Rekhila, H. Lahmar, S. Habi Ben Hariz, M. Benamira and M. Trari, *Inorg. Chem. Commun.*, 2024, **164**, 112349.
- 4 J. Li, F. Wu, N. Deng, E. M. Glebov, N. M. Bazhin, *Reaction. Kinet. Catal. L.*, 2008, **95**, 247–255.
- 5 J. Wang, M. Zhang, R. Zhou, J. Li, W. Zhao and W. Chen, *J. Environ. Chem. Eng.*, 2021, **9**, 104907.
- 6 F. Chen, Y. Li, L. Guo and J. Zhang, *J. Hazard. Mater.*, 2009, **169**, 711–718.
- 7 D. Xie, C. Tang, D. Li, J. Yuan and F. Xu, *Inorg. Chem. Commun.*, 2023, **156**, 111085.
